# Supplementary material for: Anti-CTLA-4 and anti-PD-1 immunotherapies repress tumor progression in preclinical breast and colon model with independent regulatory T cells response
Source: PubMed Central journal article supplement (PMC8961218; doi:10.1016/j.tranon.2022.101405), 2022-03-24

Figure S4

**A**

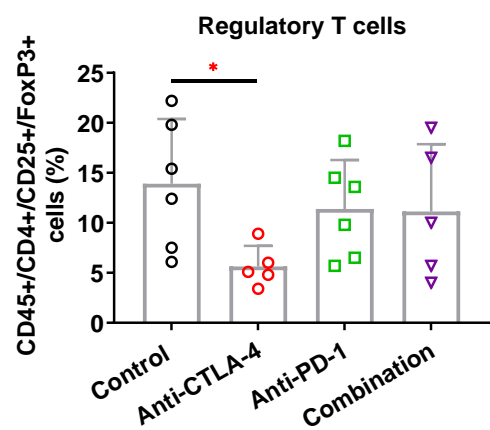

**B**

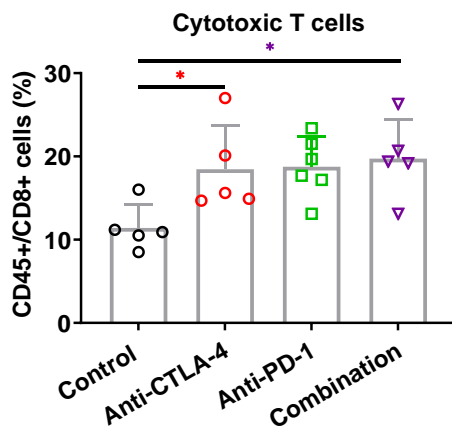

**C**

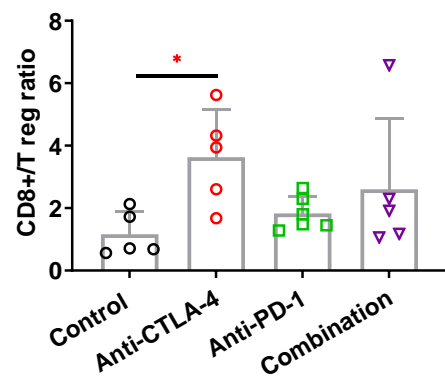

Supplement: mmc4.pdf [file mmc4.pdf]
